# Supplementary material for: Supplementation of antihypertensive drug regimen with vitamin E ameliorates alterations of primary haemodynamic parameters and total antioxidant capacity in ovariectomised rats
Source: publisher site journal article supplement (doi:10.1515/jbcpp-2020-0097), 2021-08-06
Supplement: Supplementary file 1 [file j_jbcpp-2020-0097_suppl.docx]

UNIVERSITY OF IBADAN, IBADAN, NIGERIA

**DEPARTMENT OF ENGLISH**


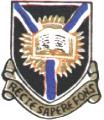
**Emmanuel Babatunde Omobowale, *Ph.D* E-mail:** [***ebomobowale@yahoo.com***](mailto:ebomobowale@yahoo.com)

# Professor of Literature and Medicine

+234(0)8183994038

16th June, 2021

Dr Alberto Marra,

The Editor,

*Journal of Basic and Clinical Physiology and Pharmacology*,

Germany.

Dear Sir,

**LETTER OF CONFIRMATION OF PAPER EDITING:** **‘SUPPLEMENTATION OF ANTIHYPERTENSIVE DRUG REGIMEN WITH VITAMIN E AMELIORATES ALTERATIONS OF PRIMARY HAEMODYNAMIC PARAMETERS AND TOTAL ANTIOXIDANT CAPACITY IN OVARIECTOMISED RATS’**

My name is Emmanuel Babatunde Omobowale. I am a Professor and the Director of the Distance Learning Centre of the University of lbadan. I teach various aspects of Literature in the Department of English, of the University of Ibadan. Between November 2012 and July 31, 2017, I served as the Head of the Department. Prior to my recruitment as a lecturer in the University of Ibadan, I had worked as an Editor at Heinemann Educational Books Limited, one of Nigeria’s leading publishers.

I would like to sue this medium to confirm that I had the privilege of reading and editing a paper written by Drs. T.O. Ajibade, Foluso B. Falade, A.A. Oyagbemi, I.W. Ajileye and T.O. Omobowale, entitled ‘Supplementation of Antihypertensive Drug Regimen with Vitamin E Ameliorates Alterations of Primary Haemodynamic Parameters and Total Antioxidant Capacity in Ovariectomised Rats’. I derived much pleasure while reading the article and I can affirm that it is well-written. It is therefore an incontrovertible fact that the authors have a very good command of the English Language. I therefore recommend the publication of the edited version, which I have already sent to the authors, for necessary action. If you have any further question or you would like to discuss this confirmation letter, please feel free to contact me.

Yours faithfully,


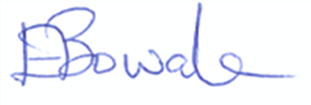


E.B. Omobowale, PhD

Professor of Literature and Medicine
